# Supplementary material
Source: publisher figshare collection journal article supplement (https://frontiersin.figshare.com/ndownloader/files/14250890)
Supplement: Supplementary file 1 [file 14250890]

**Table S1.** The effect of site and season on total gene abundance (sum of *nos*Z, *nir*K and *nir*S) in the field and lab experiments. Model 1 used the field data from Citrus and Forest 1. Model 2 used the field data from Eucalyptus and Forest 2. Model 3 used the lab data from Citrus and its forest control. Model 4 used the lab data from Eucalyptus and its forest control. Models 3 and 4 were log transformed to conform to the assumptions of normality and equal variance.

| Effect | Model 1 | Model 2 | Model 3 | Model 4 |
| --- | --- | --- | --- | --- |
|  | *p-*value | | | |
| Site | 0.16 | 0.08 | 0.67 | 0.55 |
| Season | 0.27 | 0.94 | 0.84 | 0.07 |
| Site X Season | 0.41 | 0.68 | 0.60 | 0.09 |
